# Supplementary material for: Effectiveness of Virtual Yoga for Chronic Low Back Pain: A Randomized Clinical Trial
Source: PubMed Central journal article supplement (PMC11530940; doi:10.1001/jamanetworkopen.2024.42339), 2024-11-01
Supplement: jamanetwopen-e2442339-s002.pdf [file jamanetwopen-e2442339-s002.pdf]

## Supplementary Online Content

Tankha H, Gaskins D, Shallcross A, et al. Effectiveness of virtual yoga for chronic low back pain: a randomized clinical trial. *JAMA Netw Open*. 2024;7(11):e2442339.  
doi:10.1001/jamanetworkopen.2024.42339

**eTable 1.** Sensitivity Analysis of Primary Outcomes Using Multiple Imputation

**eTable 2.** Participants Experiencing Clinically Important Changes in Co-Primary Outcomes (30% or Greater Reduction From Baseline)

This supplementary material has been provided by the authors to give readers additional information about their work.

**eTable 1. Sensitivity Analysis of Primary Outcomes Using Multiple Imputation**

| Outcome Measure                       | Mean baseline value (SE) | Mean change from baseline (95% CI) |                |                     |                |                     |                |
|---------------------------------------|--------------------------|------------------------------------|----------------|---------------------|----------------|---------------------|----------------|
|                                       |                          | 6 weeks (95% CI)                   | <i>p</i> value | 12 weeks (95% CI)   | <i>p</i> value | 24 weeks (95% CI)   | <i>p</i> value |
| <b>Pain Intensity</b> ‡               |                          |                                    |                |                     |                |                     |                |
| Yoga Now                              | 5.7 (0.2)                | -1.4 (-1.9 to -0.8)                |                | -1.7 (-2.2 to -1.1) |                | -2.1 (-2.6 to -1.6) |                |
| Yoga Later                            | 5.8 (0.2)                | -0.2 (-0.8 to 0.3)                 |                | -0.3 (-0.9 to 0.2)  |                | -0.2 (-0.7 to 0.4)  |                |
| Between-group mean difference         |                          | -1.1 (-1.9 to -0.3)                | .005           | -1.3 (-2.1 to -0.6) | < .001         | -2.0 (-2.7 to -1.2) | < .001         |
| <b>Back-related Function (RMDQ)</b> § |                          |                                    |                |                     |                |                     |                |
| Yoga Now                              | 11.7 (0.6)               | -2.7 (-3.9 to -1.5)                |                | -3.7 (-4.9 to -2.5) |                | -5.6 (-7.2 to -4.0) |                |
| Yoga Later                            | 12.4 (0.6)               | -0.6 (-1.8 to 0.7)                 |                | -1.7 (-2.8 to -0.7) |                | -1.7 (-2.8 to -0.6) |                |
| Between-group mean difference         |                          | -2.1 (-3.8 to -0.4)                | .01            | -1.9 (-3.6 to -0.3) | 0.02           | -3.9 (-5.8 to -2.0) | < .001         |

RMDQ = Roland Morris Disability Questionnaire

‡ Measured using an 11-point numerical rating scale for average pain intensity in the previous week, with 0 indicating no pain and 10 indicating worst pain possible.

§ Scores range from 0 to 23, with higher scores representing poorer function.

**eTable 2. Participants Experiencing Clinically Important Changes in Co-Primary Outcomes (30% or Greater Reduction From Baseline)**

|                      | 6 weeks     |               | 12 weeks    |               | 24 weeks    |               |
|----------------------|-------------|---------------|-------------|---------------|-------------|---------------|
|                      | Yoga<br>Now | Yoga<br>Later | Yoga<br>Now | Yoga<br>Later | Yoga<br>Now | Yoga<br>Later |
| <b>Observed data</b> |             |               |             |               |             |               |
| Pain Intensity‡      | 30.1%       | 14.5%         | 38.0%       | 20.3%         | 36.6%       | 13.0%         |
| RMDQ§                | 33.8%       | 13.0%         | 42.3%       | 24.6%         | 47.9%       | 26.1%         |
| <b>Imputed data</b>  |             |               |             |               |             |               |
| Pain Intensity‡      | 42.3%       | 22.3%         | 52.4%       | 23.5%         | 53.5%       | 16.2%         |
| RMDQ§                | 44.2%       | 18.8%         | 55.2%       | 30.7%         | 71.0%       | 33.3%         |

RMDQ = Roland Morris Disability Questionnaire

‡ Measured using an 11-point numerical rating scale for average pain intensity in the previous week, with 0 indicating no pain and 10 indicating worst pain possible.

§ Measure of back-related function with scores ranging from 0 to 23, with higher scores representing poorer function.
