# Supplementary material for: Effectiveness of Virtual Yoga for Chronic Low Back Pain: A Randomized Clinical Trial
Source: PubMed Central journal article supplement (PMC11530940; doi:10.1001/jamanetworkopen.2024.42339), 2024-11-01
Supplement: jamanetwopen-e2442339-s004.pdf [file jamanetwopen-e2442339-s004.pdf]

## Data Sharing Statement

Tankha. Effectiveness of Virtual Yoga for Chronic Low Back Pain. *JAMA Netw Open*.  
Published November 01, 2024. doi:10.1001/jamanetworkopen.2024.42339

### Data

**Additional Information:** ClinicalTrials.gov (NCT05319691)

**Data available:** Yes

**Data types:** Deidentified participant data, Data dictionary

**How to access data:** [saperr@ccf.org](mailto:saperr@ccf.org)

**When available:** With publication

### Supporting Documents

**Document types:** None

### Additional Information

**Who can access the data:** researchers whose proposed use of the data has been approved

**Types of analyses:** for any purpose

**Mechanisms of data availability:** with a signed data access agreement
